# Supplementary material for: Al-doped ZnO inverse opal networks as efficient electron collectors in BiVO4 photoanodes for solar water oxidation
Source: Royal Society of Chemistry journal article supplement (doi:10.1039/c3ee44031a), 2014-01-01
Supplement: c3ee44031a1.pdf [file c3ee44031a1.pdf]

## Electronic Supporting Information

### **Al-doped ZnO Inverse Opal Networks as Efficient Electron Collectors in BiVO<sub>4</sub> Photoanodes for Solar Water Oxidation**

Liwu Zhang, Erwin Reisner, Jeremy J. Baumberg

Dr. L.-W. Zhang, Prof. J. J. Baumberg  
Cavendish Laboratory, Department of Physics, University of Cambridge  
Cambridge, CB3 0HE (UK)  
E-mail: [jjb12@cam.ac.uk](mailto:jjb12@cam.ac.uk)

Dr. E. Reisner  
Department of Chemistry, University of Cambridge  
Cambridge, CB2 1EW (UK)  
E-mail: [reisner@ch.cam.ac.uk](mailto:reisner@ch.cam.ac.uk)

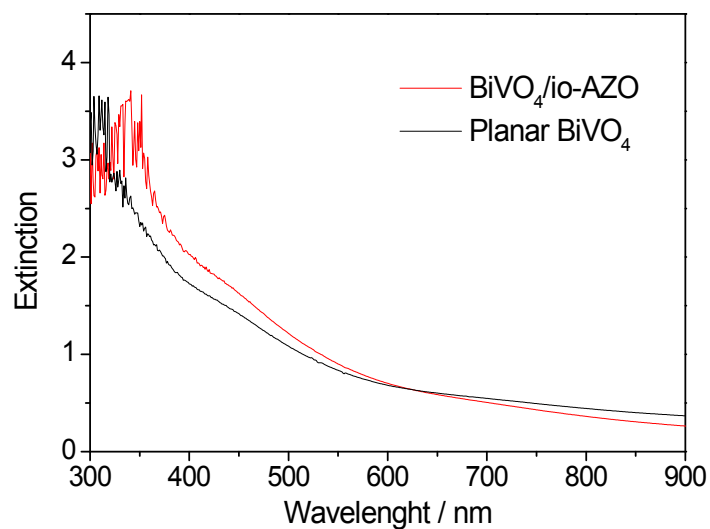

**Figure S1.** UV-Vis extinction spectra of planar BiVO<sub>4</sub> and BiVO<sub>4</sub>/io-AZO heterostructure electrodes.

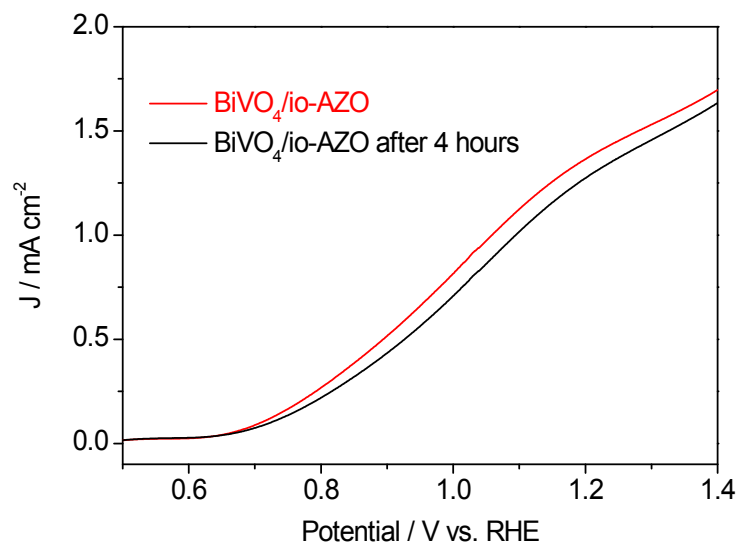

**Figure S2.** Photostability study of BiVO<sub>4</sub>/io-AZO heterostructure photoanode. The linear sweep photocurrent was recorded immediately after exposing the electrode to light and after 4 hrs water splitting at 1.23 V vs RHE.
